# Supplementary material for: Breeding of lilies and tulips—Interspecific hybridization and genetic background—
Source: PubMed Central journal article supplement — Breed Sci. 2018 Mar 8;68(1):35–52. doi: 10.1270/jsbbs.17097 (PMC5903980; doi:10.1270/jsbbs.17097), 2018-03-08
Supplement: 68_17097_2.pdf [file 68_17097_2.pdf]

**Supplemental Table 1.** Genome composition, types of meiotic polyploidizaion, and recombinant rate of the plants in the backcross progenies originated from interspecific crossing of lilies

| Authors                    | Genome composition of parent and crossing direction | Proge-nies      | No. of analyzed plants (Chr. No.) | Genome composition of the analyzed plants (Chr. No.) | Types of meiosis (No. of plants) | Without and with recombination (No. of plants) <sup>3)</sup> |
|----------------------------|-----------------------------------------------------|-----------------|-----------------------------------|------------------------------------------------------|----------------------------------|--------------------------------------------------------------|
| Lim et al. 2000            | LL <sup>1)</sup> × RR                               | F <sub>1</sub>  | 2 (2n=24)                         | LR <sup>2)</sup>                                     | Normal                           | -                                                            |
|                            | LLRR × LL                                           | BC <sub>1</sub> | 9 (2n=36)                         | LLR                                                  | Normal                           | No                                                           |
|                            | LLR × LLLL                                          | BC <sub>2</sub> | 1 (2n=42)                         | LLLLR <sup>6)</sup>                                  | Normal                           | No                                                           |
|                            |                                                     |                 | 1 (2n=43)                         | LLLLR <sup>7)</sup>                                  | Normal                           | No                                                           |
|                            |                                                     |                 | 1 (2n=44)                         | LLLLR <sup>8)</sup>                                  | Normal                           | No                                                           |
| Zhou et al. 2008           | LA × AA                                             | BC <sub>1</sub> | 17(2n=36)                         | LAA                                                  | FDR (17)                         | Yes (12)                                                     |
|                            |                                                     |                 | 1 (2n=37)                         | L(AA) <sup>25)</sup>                                 | FDR (1)                          | Yes (1)                                                      |
|                            |                                                     |                 | 1(2n=37)                          | L <sup>13)</sup> AA                                  | FDR (1)                          | Yes (1)                                                      |
| Kahn et al. 2010           | LA × AA                                             | BC <sub>1</sub> | 42(2n=36)                         | LAA                                                  | FDR (42)                         | Yes (38)                                                     |
|                            |                                                     |                 | 2 (2n=36)                         | L <sup>11)</sup> (AA) <sup>25)</sup>                 | IMR (2)                          | Yes (2)                                                      |
|                            |                                                     |                 | 2 (2n=36)                         | L <sup>13)</sup> (AA) <sup>23)</sup>                 | IMR (2)                          | Yes (2)                                                      |
|                            |                                                     |                 | 1 (2n=37)                         | L(AA) <sup>25)</sup>                                 | FDR (1)                          | Yes (1)                                                      |
|                            |                                                     |                 | 1 (2n=37)                         | L <sup>13)</sup> AA                                  | FDR (1)                          | Yes (1)                                                      |
|                            | AA × LA                                             | BC <sub>1</sub> | 11 (2n=36)                        | LAA                                                  | FDR (11)                         | Yes (8)                                                      |
|                            |                                                     |                 | 4 (2n=36)                         | L <sup>10)</sup> (AA) <sup>26)</sup>                 | IMR (4)                          | Yes (4)                                                      |
|                            |                                                     |                 | 3 (2n=35)                         | L <sup>11)</sup> AA                                  | FDR (1)                          | Yes (3)                                                      |
|                            | AA × OA                                             | BC <sub>1</sub> | 1(2n=37)                          | L <sup>13)</sup> AA                                  | FDR (1)                          | Yes (1)                                                      |
|                            |                                                     |                 | 47 (2n=36)                        | OAA                                                  | FDR (47)                         | Yes (42)                                                     |
|                            |                                                     |                 | 1 (2n=37)                         | O(AA) <sup>25)</sup>                                 | FDR (1)                          | Yes (1)                                                      |
|                            |                                                     |                 | 3 (2n=48)                         | OAAA                                                 | FDR (3)*                         | Yes (1)                                                      |
|                            |                                                     |                 | 1 (2n=48)                         | O <sup>11)</sup> (AAA) <sup>37)</sup>                | IMR (1)*                         | Yes (1)                                                      |
| Barba-Gonzalez et al. 2005 | AA × OA                                             | BC <sub>1</sub> | 29 (2n=36)                        | OAA                                                  | FDR (28), IMR (1)                | Yes (19)                                                     |
|                            |                                                     |                 | 2(2n=48)                          | OAAA                                                 | FDR (2) *                        | Yes (1)                                                      |
|                            |                                                     |                 | 1(2n=48)                          | O <sup>11)</sup> (AAA) <sup>37)</sup>                | IMR (1) *                        | Yes (1)                                                      |
|                            | OA × AA                                             | BC <sub>1</sub> | 1(2n=36)                          | OAA                                                  | FDR (1)                          | No                                                           |
|                            | OOAA × OA                                           | F <sub>2</sub>  | 1 (2n=48)                         | OOAA                                                 | Normal                           | No                                                           |
| 1(2n=72)                   |                                                     |                 | OOOAAA                            | FDR (1) *                                            | Yes (1)                          |                                                              |
| Luo et al. 2012            | OT × OO                                             | BC <sub>1</sub> | 14(2n=36)                         | OOT                                                  | FDR (14)                         | Yes (13)                                                     |
|                            |                                                     |                 | 1(2n=25)                          | (OO) <sup>22)</sup> T <sup>3)</sup>                  | Normal                           | Yes (1)                                                      |
|                            |                                                     |                 | 1 (2n=27)                         | (OO) <sup>23)</sup> T <sup>4)</sup>                  | Normal                           | Yes (1)                                                      |
|                            | OO × OT                                             | BC <sub>1</sub> | 1 (2n=24)                         | (OO) <sup>22)</sup> T <sup>2)</sup>                  | Normal                           | Yes (1)                                                      |
|                            |                                                     |                 | 1(2n=25)                          | (OO) <sup>23)</sup> T <sup>2)</sup>                  | Normal                           | No                                                           |
|                            | OOT × OO                                            | BC <sub>2</sub> | 3(2n=25)                          | OOT <sup>1)</sup>                                    | Normal                           | No                                                           |
|                            |                                                     |                 | 1(2n=26)                          | OOT <sup>2)</sup>                                    | Normal                           | No                                                           |
|                            |                                                     |                 | 2(2n=27)                          | OOT <sup>3)</sup>                                    | Normal                           | Yes (1)                                                      |
|                            |                                                     |                 | 2(2n=28)                          | OOT <sup>4)</sup>                                    | Normal                           | No                                                           |
|                            |                                                     |                 | 1(2n=29)                          | OOT <sup>5)</sup>                                    | Normal                           | Yes (1)                                                      |
|                            |                                                     |                 | 1(2n=32)                          | (AA) <sup>22)</sup> M <sup>14)</sup>                 | IMR (1)                          | Yes (1)                                                      |
|                            | MA × AA                                             | BC <sub>1</sub> | 1(2n=35)                          | AAM <sup>11)</sup>                                   | FDR (1)                          | Yes (1)                                                      |
|                            |                                                     |                 | 1(2n=32)                          | (AA) <sup>22)</sup> M <sup>10)</sup>                 | FDR (1)                          | Yes (1)                                                      |

<sup>1)</sup> *L. longiflorum* (LL), *L. rubellum* (RR), Oriental hybrids (OO), Trumpet hybrids (TT), *L. martagon* (MM) Asiatic hybrid and its parental species (AA).

<sup>2)</sup> Superscript indicates aneuploidy of genome, and without superscript indicates euploid genome (n=12)

<sup>3)</sup> No of plants detected chromosome recombination.

\* : Bilateral polyploidization. FDR or IMR probably occurred in the male gamete formation.
